# Supplementary material for: The roles of betaine-ester analogues of 1-N-alkyl-3-N′-methyl imidazolium salts: as amphotropic ionic liquid crystals and organogelators
Source: Royal Society of Chemistry journal article supplement (doi:10.1039/c3ra43067g), 2013-01-01
Supplement: c3ra43067g.pdf [file c3ra43067g.pdf]

## Electronic Supplementary information

### The Roles of Betaine - Ester Analogues of 1-*N*-alkyl-3-*N'*-methyl Imidazolium Salts: As Amphotropic Ionic Liquid Crystals, and Organogelators

Jing C. W. Tseng,<sup>a</sup> Rohini Rondla,<sup>a</sup> Padi Y. S. Su,<sup>a</sup> and Ivan J. B. Lin \*<sup>a</sup>

<sup>a</sup>*Department of Chemistry, National Dong Hwa University, Shoufeng, Hualien 974, TaiwanE-mail: ijblin@mail.ndhu.edu.tw; Fax: +886-3-863-3570*

#### Experimental Section.

**Instrumentation.** The <sup>1</sup>H NMR and <sup>13</sup>C NMR spectra were recorded on Bruker Advance DXP<sub>400</sub> spectrometer in CDCl<sub>3</sub>. The solvents used were reagent grade and without further purification. IR spectra were recorded with a Perkin-Elmer Spectrum One. Optical characterization was performed by using covered microscope slides on an Olympus BH-2 polarizing microscope equipped with a Mettler Toledo FP82 hot stage and a Mettler Toledo FP90 central processor. Phase transition temperatures were determined by differential scanning calorimetry (DSC) at a scan rate of 10 °C/min using Mettler Toledo DSC822 calorimeter calibrated under flowing N<sub>2</sub> with indium and tin standards. The decomposition temperatures were determined by thermo gravimetric analysis using a Mettler Toledo TGA851. The powder X-ray diffraction patterns were obtained by National Dong Hwa University with Cu K $\alpha$  radiation (XRD D8Advanced, Bruker) and by National Synchrotron Radiation Research Center. Scanning electron microscopy (SEM) images were obtained using a JEOL JEM-6500F operated at 15 KV. The UV-Visible absorption spectra of the Ag-NPs dispersions were obtained using PerkinElmer Lambda 750 spectrophotometer. DLS and ZP measurements were performed on different concentrations of lyotropic LC solutions at room temperature using a Zetasizer Nano ZS ZEN 3600 instrument. The images of nanoparticles were acquired by an Analytical Transmission Electron Microscope (JEOL JEM-3010).

**Octyl 2-bromoacetate:** Colorless liquid (Yield: 79%). <sup>1</sup>H NMR (400 MHz, CDCl<sub>3</sub>):  $\delta$  4.12 (t, *J* = 8 Hz, 2H, CH<sub>2</sub>), 3.79 (s, 2H, CH<sub>2</sub>), 1.61 (t, *J* = 8 Hz, 2H, CH<sub>2</sub>), 1.23 (m, 10H, CH<sub>2</sub>), 0.83 (t, *J* = 8 Hz, 3H, CH<sub>3</sub>).

**Decyl 2-bromoacetate:** Colorless liquid (Yield: 76%). <sup>1</sup>H NMR (400 MHz, CDCl<sub>3</sub>):  $\delta$  4.12 (t, *J* = 8 Hz, 2H, CH<sub>2</sub>), 3.79 (s, 2H, CH<sub>2</sub>), 1.62 (*J* = 8 Hz, 2H, CH<sub>2</sub>), 1.22 (m, 14H, CH<sub>2</sub>), 0.84 (t, *J* = 8 Hz, 3H, CH<sub>3</sub>).

**Dodecyl 2-bromoacetate:** Colorless liquid (Yield: 79%).  $^1\text{H}$  NMR (400 MHz,  $\text{CDCl}_3$ ):  $\delta$  3.38 (t,  $J = 8$  Hz, 2H,  $\text{CH}_2$ ), 1.84 (t,  $J = 8$  Hz, 2H,  $\text{CH}_2$ ), 1.25 (m, 18H,  $\text{CH}_2$ ), 0.87 (t,  $J = 8$  Hz, 3H,  $\text{CH}_3$ ).

**Tetradecyl 2-bromoacetate:** Colorless liquid (Yield: 81%).  $^1\text{H}$  NMR (400 MHz,  $\text{CDCl}_3$ ):  $\delta$  4.14 (t,  $J = 8$  Hz, 2H,  $\text{CH}_2$ ), 3.80 (s, 2H,  $\text{CH}_2$ ), 1.63 ( $J = 8$  Hz, 2H,  $\text{CH}_2$ ), 1.23 (m, 22H,  $\text{CH}_2$ ), 0.85 (t,  $J = 8$  Hz, 3H,  $\text{CH}_3$ ).

**Hexadecyl 2-bromoacetate:** Colorless liquid (Yield: 83%).  $^1\text{H}$  NMR (400 MHz,  $\text{CDCl}_3$ ):  $\delta$  4.16 (t,  $J = 8$  Hz, 2H,  $\text{CH}_2$ ), 3.83 (s, 2H,  $\text{CH}_2$ ), 1.65 ( $J = 8$  Hz, 2H,  $\text{CH}_2$ ), 1.25 (m, 26H,  $\text{CH}_2$ ), 0.87 (t,  $J = 8$  Hz, 3H,  $\text{CH}_3$ ).

**Octadecyl 2-bromoacetate:** Colorless liquid (Yield: 88%).  $^1\text{H}$  NMR (400 MHz,  $\text{CDCl}_3$ ):  $\delta$  4.16 (t,  $J = 8$  Hz, 2H,  $\text{CH}_2$ ), 3.83 (s, 2H,  $\text{CH}_2$ ), 1.65 ( $J = 8$  Hz, 2H,  $\text{CH}_2$ ), 1.25 (m, 30H,  $\text{CH}_2$ ), 0.87 (t,  $J = 8$  Hz, 3H,  $\text{CH}_3$ ).

**1-methyl-3-octaneoxyoxoethyl-imidazolium bromide [ $\text{C}_1$ ,  $\text{EC}_8\text{-Im}$ ] $\text{Br} \cdot 2.5 \text{H}_2\text{O}$ .** Sticky solid. (Yield: 2.54g, 77%).  $^1\text{H}$  NMR (400 MHz,  $\text{CDCl}_3$ ):  $\delta$  9.54 (s, 1H, Ar-H), 7.55 (s, 2H, Ar-H), 5.35 (s, 2H,  $\text{CH}_2$ ), 4.14 (t,  $J = 8$  Hz, 2H,  $\text{CH}_2$ ), 4.00 (s, 3H,  $\text{CH}_3$ ), 1.62 (t,  $J = 8$  Hz, 2H,  $\text{CH}_2$ ), 1.24 (m, 10H,  $\text{CH}_2$ ), 0.84 (t,  $J = 8$  Hz, 3H,  $\text{CH}_3$ ).  $^{13}\text{C}$  NMR (100 MHz,  $\text{CDCl}_3$ ):  $\delta$  166.61 (C=O), 137.94 (NCN), 123.67 (NCHCHN), 123.42 (NCHCHN), 66.97 (NCH $_3$ ), 50.34 (NCH $_2$ ), 36.97 ( $\text{CH}_2$ ), 31.75 ( $\text{CH}_2$ ), 29.15 ( $\text{CH}_2$ ), 29.13 ( $\text{CH}_2$ ), 28.34 ( $\text{CH}_2$ ), 25.69 ( $\text{CH}_2$ ), 22.60 ( $\text{CH}_2$ ), 14.05 ( $\text{CH}_3$ ). Elemental analysis: Anal. Calcd for  $\text{C}_{14}\text{H}_{30}\text{BrN}_2\text{O}_{4.5}$ : C, 44.45; H, 7.99; N, 7.41. Found: C, 44.30; H, 8.02; N, 7.41.

**1-methyl-3-decaneoxyoxoethyl-imidazolium bromide [ $\text{C}_1$ ,  $\text{EC}_{10}\text{-Im}$ ] $\text{Br} \cdot 1\text{H}_2\text{O}$ .** Sticky solid. (Yield: 2.73g, 77%).  $^1\text{H}$  NMR (400 MHz,  $\text{CDCl}_3$ ):  $\delta$  9.41 (s, 1H, Ar-H), 7.57 (s, 1H, Ar-H), 7.54 (s, 1H, Ar-H), 5.32 (s, 2H,  $\text{CH}_2$ ), 4.13 (t,  $J = 4\text{Hz}$ , 2H,  $\text{CH}_2$ ), 3.97 (s, 3H,  $\text{CH}_3$ ), 1.61 (t,  $J = 8$  Hz, 2H,  $\text{CH}_2$ ), 1.22 (m, 14H,  $\text{CH}_2$ ), 0.83 (t,  $J = 8$  Hz, 3H,  $\text{CH}_3$ ).  $^{13}\text{C}$  NMR (100 MHz,  $\text{CDCl}_3$ ):  $\delta$  166.76 (C=O), 137.78 (NCN), 123.65 (NCHCHN), 123.54 (NCHCHN), 66.93 (NCH $_3$ ), 50.31 (NCH $_2$ ), 36.93 ( $\text{CH}_2$ ), 31.86 ( $\text{CH}_2$ ), 29.55 ( $\text{CH}_2$ ), 29.52 ( $\text{CH}_2$ ), 29.29 ( $\text{CH}_2$ ), 29.25 ( $\text{CH}_2$ ), 28.36 ( $\text{CH}_2$ ), 25.70 ( $\text{CH}_2$ ), 22.64 ( $\text{CH}_2$ ), 14.07 ( $\text{CH}_3$ ). Elemental analysis : Anal. Calcd for  $\text{C}_{16}\text{H}_{31}\text{BrN}_2\text{O}_3$ : C, 50.66; H, 8.24; N, 7.38. Found: C, 50.63; H, 8.09; N 7.40.

**1-methyl-3-dodecaneoxyoxoethyl-imidazolium bromide [ $\text{C}_1$ ,  $\text{EC}_{12}\text{-Im}$ ] $\text{Br} \cdot 1\text{H}_2\text{O}$ .** Sticky solid. (Yield: 2.73g, 74%).  $^1\text{H}$  NMR (400 MHz,  $\text{CDCl}_3$ ):  $\delta$  10.01 (s, 1H, Ar-H), 7.53 (s, 1H, Ar-H), 7.44 (s, 1H, Ar-H), 5.43 (s, 2H,  $\text{CH}_2$ ), 4.19 (t,  $J = 8$  Hz, 2H,  $\text{CH}_2$ ), 4.08 (s, 3H,  $\text{CH}_3$ ), 1.67 (t,  $J = 8$  Hz, 2H,  $\text{CH}_2$ ), 1.26 (m, 18H,  $\text{CH}_2$ ), 0.88 (t,  $J = 8$  Hz, 3H,  $\text{CH}_3$ ).  $^{13}\text{C}$  NMR (100 MHz,  $\text{CDCl}_3$ ):  $\delta$  166.23 (C=O), 138.57 (NCN), 123.61 (NCHCHN), 122.91 (NCHCHN), 67.11 (NCH $_3$ ), 50.34 (NCH $_2$ ), 36.93 ( $\text{CH}_2$ ), 31.89 ( $\text{CH}_2$ ), 29.62 ( $\text{CH}_2$ ), 29.57 ( $\text{CH}_2$ ), 29.47 ( $\text{CH}_2$ ), 29.33 ( $\text{CH}_2$ ), 29.18 ( $\text{CH}_2$ ), 28.35 ( $\text{CH}_2$ ), 25.70 ( $\text{CH}_2$ ), 22.67 ( $\text{CH}_2$ ), 14.10 ( $\text{CH}_3$ ). Elemental analysis: Anal. Calcd for  $\text{C}_{18}\text{H}_{35}\text{BrN}_2\text{O}_3$ : C, 53.07; H, 8.66; N, 6.88. Found: C, 53.46; H, 8.54; N 6.84.

**1-methyl-3-tetradecaneoxyoxoethyl-imidazolium bromide [ $\text{C}_1$ ,  $\text{EC}_{14}\text{-Im}$ ] $\text{Br} \cdot 1\text{H}_2\text{O}$ .** White Solid (Yield: 2.03g, 79%).  $^1\text{H}$  NMR (400 MHz,  $\text{CDCl}_3$ ):  $\delta$  9.99 (s, 1H, Ar-H), 7.59 (s, 1H, Ar-H), 7.51 (s, 1H, Ar-H), 5.41 (s, 2H,  $\text{CH}_2$ ), 4.14 (t,  $J = 8$  Hz, 2H,  $\text{CH}_2$ ), 4.05 (s, 3H,  $\text{CH}_3$ ), 1.62 (t,  $J = 8$  Hz, 2H,  $\text{CH}_2$ ), 1.21 (m, 22H,  $\text{CH}_2$ ), 0.83 (t,  $J = 8$  Hz, 3H,  $\text{CH}_3$ ).  $^{13}\text{C}$  NMR (100 MHz,  $\text{CDCl}_3$ ):  $\delta$

166.17 (C=O), 138.59 (NCN), 123.64 (NCHCHN), 122.89 (NCHCHN), 67.13 (NCH<sub>3</sub>), 50.43 (NCH<sub>2</sub>), 36.93 (CH<sub>2</sub>), 31.90 (CH<sub>2</sub>), 29.66 (CH<sub>2</sub>), 29.64 (CH<sub>2</sub>), 29.58 (CH<sub>2</sub>), 29.48 (CH<sub>2</sub>), 29.34 (CH<sub>2</sub>), 29.18 (CH<sub>2</sub>), 28.35 (CH<sub>2</sub>), 25.71 (CH<sub>2</sub>), 22.67 (CH<sub>2</sub>), 14.10 (CH<sub>3</sub>). Elemental analysis: Anal. Calcd for C<sub>20</sub>H<sub>39</sub>BrN<sub>2</sub>O<sub>3</sub>: C, 55.17; H, 9.03; N, 6.43. Found: C, 55.54; H, 9.21; N, 6.25.

**1-methyl-3-hexadecanoxyoxoethyl-imidazolium bromide [C<sub>1</sub>, EC<sub>16</sub>-Im]Br · 1H<sub>2</sub>O.** White Solid (Yield: 2.35g, 78%). <sup>1</sup>H NMR (400 MHz, CDCl<sub>3</sub>): δ 9.87 (s, 1H, Ar-H), 7.58 (s, 1H, Ar-H), 7.52 (s, 1H, Ar-H), 5.40 (s, 2H, CH<sub>2</sub>), 4.14 (t, *J* = 8 Hz, 2H, CH<sub>2</sub>), 4.04 (s, 3H, CH<sub>2</sub>), 1.62 (t, *J* = 8 Hz, 2H, CH<sub>2</sub>), 1.21 (m, 26H, CH<sub>2</sub>), 0.83 (t, *J* = 8 Hz, 3H, CH<sub>3</sub>). <sup>13</sup>C NMR (100 MHz, CDCl<sub>3</sub>): δ 166.15 (C=O), 137.91 (NCN), 123.83 (NCHCHN), 123.25 (NCHCHN), 66.90 (NCH<sub>3</sub>), 50.17 (NCH<sub>2</sub>), 36.83 (CH<sub>2</sub>), 31.80 (CH<sub>2</sub>), 29.59 (CH<sub>2</sub>), 29.40 (CH<sub>2</sub>), 29.24 (CH<sub>2</sub>), 29.12 (CH<sub>2</sub>), 28.24 (CH<sub>2</sub>), 25.61 (CH<sub>2</sub>), 22.56 (CH<sub>2</sub>), 14.02 (CH<sub>3</sub>). Elemental analysis: Anal. Calcd for C<sub>22</sub>H<sub>43</sub>BrN<sub>2</sub>O<sub>3</sub>: C, 57.01; H, 9.35; N, 6.04. Found: C, 57.27; H, 9.35; N, 6.28.

**1-methyl-3-octadecanoxyoxoethyl-imidazolium bromide [C<sub>1</sub>, EC<sub>18</sub>-Im]Br · 1H<sub>2</sub>O.** White Solid (Yield: 2.58g, 81%). <sup>1</sup>H NMR (400 MHz, CDCl<sub>3</sub>): δ 9.96 (s, 1H, Ar-H), 7.59 (s, 1H, Ar-H), 7.52 (s, 1H, Ar-H), 5.41 (s, 2H, CH<sub>2</sub>), 4.14 (t, *J* = 8 Hz, 2H, CH<sub>2</sub>), 4.05 (s, 3H, CH<sub>2</sub>), 1.62 (t, *J* = 8 Hz, 2H, CH<sub>2</sub>), 1.21 (m, 30H, CH<sub>2</sub>), 0.83 (t, *J* = 8 Hz, 3H, CH<sub>3</sub>). <sup>13</sup>C NMR (100 MHz, CDCl<sub>3</sub>): δ 166.20 (C=O), 138.29 (NCN), 123.76 (NCHCHN), 123.09 (NCHCHN), 67.05 (NCH<sub>3</sub>), 50.31 (NCH<sub>2</sub>), 36.92 (CH<sub>2</sub>), 31.89 (CH<sub>2</sub>), 29.67 (CH<sub>2</sub>), 29.48 (CH<sub>2</sub>), 29.32 (CH<sub>2</sub>), 29.19 (CH<sub>2</sub>), 28.34 (CH<sub>2</sub>), 25.69 (CH<sub>2</sub>), 22.65 (CH<sub>2</sub>), 14.08 (CH<sub>3</sub>). Elemental analysis: Anal. Calcd for C<sub>24</sub>H<sub>47</sub>BrN<sub>2</sub>O<sub>3</sub>: C, 58.64; H, 9.64; N, 5.70. Found: C, 58.66; H, 9.65; N, 5.67.

**Synthesis of 1-methyl-3-dodecanoxyoxoethyl-imidazolium BF<sub>4</sub> [C<sub>1</sub>, EC<sub>12</sub>-Im]BF<sub>4</sub>.** A flask was charged with [C<sub>1</sub>, EC<sub>12</sub>-Im]Br (0.5g, 1.28 mmol) and 10 mL MeOH. NH<sub>4</sub>BF<sub>4</sub> (0.135 g, 1.28 mmol) was dissolved in 30 mL of MeOH in the other flask and dropping into [C<sub>1</sub>, EC<sub>12</sub>-Im]Br solution. After 2 hours the precipitate was filtered and recrystallized from DCM/Ether to afford the white crystalline compounds (Yield: 0.47 g, 92%). <sup>1</sup>H NMR (400 MHz, CDCl<sub>3</sub>): δ 8.64 (s, 1H, Ar-H), 7.36 (s, 1H, Ar-H), 7.34 (s, 1H, Ar-H), 4.99 (s, 2H, CH<sub>2</sub>), 4.15 (t, *J* = 8 Hz, 2H, CH<sub>2</sub>), 3.87 (s, 3H, CH<sub>3</sub>), 1.64 (t, *J* = 8 Hz, 2H, CH<sub>2</sub>), 1.25 (m, 18H, CH<sub>2</sub>), 0.86 (t, *J* = 8 Hz, 3H, CH<sub>3</sub>). <sup>13</sup>C NMR (100 MHz, CDCl<sub>3</sub>): δ 166.24 (C=O), 137.64 (NCN), 123.67 (NCHCHN), 123.30 (NCHCHN), 66.99 (NCH<sub>3</sub>), 49.77 (NCH<sub>2</sub>), 36.30 (CH<sub>2</sub>), 31.90 (CH<sub>2</sub>), 29.63 (CH<sub>2</sub>), 29.51 (CH<sub>2</sub>), 29.34 (CH<sub>2</sub>), 29.23 (CH<sub>2</sub>), 28.32 (CH<sub>2</sub>), 25.68 (CH<sub>2</sub>), 22.67 (CH<sub>2</sub>), 14.09 (CH<sub>3</sub>). Elemental analysis: Anal. Calcd for C<sub>18</sub>H<sub>33</sub>BF<sub>4</sub>N<sub>2</sub>O<sub>2</sub>: C, 54.56; H, 8.39; N, 7.07. Found: C, 54.64; H, 8.49; N, 7.05.

The following compounds were prepared in the same way.

**1-methyl-3-tetradecanoxyoxoethyl-imidazolium BF<sub>4</sub> [C<sub>1</sub>, EC<sub>14</sub>-Im]BF<sub>4</sub>.** White solid (Yield: 0.45g, 90%). <sup>1</sup>H NMR (400MHz, CDCl<sub>3</sub>): δ 8.72 (s, 1H, Ar-H), 7.35 (s, 1H, Ar-H), 7.32 (s, 1H, Ar-H), 5.01 (s, 2H, CH<sub>2</sub>), 4.18 (t, *J* = 4Hz, 2H, CH<sub>2</sub>), 3.91 (s, 3H, CH<sub>3</sub>), 1.67 (t, *J* = 8 Hz, 2H, CH<sub>2</sub>), 1.25 (m, 22H, CH<sub>2</sub>), 0.87 (t, *J* = 8 Hz, 3H, CH<sub>3</sub>). <sup>13</sup>C NMR (100 MHz, CDCl<sub>3</sub>): δ 166.16 (C=O), 137.78 (NCN), 123.64 (NCHCHN), 123.18 (NCHCHN), 67.06 (NCH<sub>3</sub>), 49.82 (NCH<sub>2</sub>), 36.38 (CH<sub>2</sub>), 31.92 (CH<sub>2</sub>), 29.69 (CH<sub>2</sub>), 29.66 (CH<sub>2</sub>), 29.62 (CH<sub>2</sub>), 29.51 (CH<sub>2</sub>), 29.36 (CH<sub>2</sub>), 29.22 (CH<sub>2</sub>), 28.32 (CH<sub>2</sub>), 25.69 (CH<sub>2</sub>), 22.68 (CH<sub>2</sub>), 14.10 (CH<sub>3</sub>). Elemental analysis: Anal. Calcd for C<sub>20</sub>H<sub>37</sub>BF<sub>4</sub>N<sub>2</sub>O<sub>2</sub>: C, 56.61; H, 8.79; N, 6.60. Found: C, 56.27; H, 8.76; N, 6.55.

**1-methyl-3-hexadecanoxyoxoethyl-imidazolium BF<sub>4</sub> [C<sub>1</sub>, EC<sub>16</sub>-Im]BF<sub>4</sub>.** White solid (Yield: 0.47g, 93%). <sup>1</sup>H NMR (400 MHz, CDCl<sub>3</sub>): δ 8.44 (s, 1H, Ar-H), 7.30 (s, 1H, Ar-H), 7.28 (s, 1H, Ar-H), 4.92 (s, 2H, CH<sub>2</sub>), 4.17 (t, *J* = 8 Hz, 4H, CH<sub>2</sub>), 3.85 (s, 3H, CH<sub>3</sub>), 1.65 (t, *J* = 8 Hz, 2H, CH<sub>2</sub>), 1.25 (m, 26H, CH<sub>2</sub>), 0.87 (t, *J* = 8 Hz, 3H, CH<sub>3</sub>). <sup>13</sup>C NMR (100 MHz, CDCl<sub>3</sub>): δ 166.26 (C=O), 137.67 (NCN), 123.66 (NCHCHN), 123.25 (NCHCHN), 67.03 (NCH<sub>3</sub>), 49.77 (NCH<sub>2</sub>), 36.34 (CH<sub>2</sub>), 31.94 (CH<sub>2</sub>), 29.74 (CH<sub>2</sub>), 29.68 (CH<sub>2</sub>), 29.56 (CH<sub>2</sub>), 29.44 (CH<sub>2</sub>), 29.39 (CH<sub>2</sub>), 29.26 (CH<sub>2</sub>), 28.32 (CH<sub>2</sub>), 25.70 (CH<sub>2</sub>), 22.71 (CH<sub>2</sub>), 14.14 (CH<sub>3</sub>). Elemental analysis: Anal. Calcd for C<sub>22</sub>H<sub>41</sub>BF<sub>4</sub>N<sub>2</sub>O<sub>2</sub>: C, 58.41; H, 9.14; N, 6.19. Found: C, 58.62; H, 9.08; N, 6.16.

**Synthesis of 1-methyl-3-dodecanoxyoxoethyl-imidazolium PF<sub>6</sub> [C<sub>1</sub>, EC<sub>12</sub>-Im]PF<sub>6</sub>.** A flask was charged with [C<sub>1</sub>, EC<sub>12</sub>-im]Br (0.5g, 1.10 mmol) and 10 mL MeOH. NH<sub>4</sub>PF<sub>6</sub> (0.18g, 1.10 mmol) was dissolved in 30 mL of MeOH in the other flask and dropping into [C<sub>1</sub>, EC<sub>12</sub>-im]Br solution. After 2 hours, the precipitate was filtered and recrystallized from DCM/Ether to afford the white crystalline compounds (Yield: 0.54g, 93%). <sup>1</sup>H NMR (400 MHz, CDCl<sub>3</sub>): δ 8.55 (s, 1H, Ar-H), 7.31 (s, 1H, Ar-H), 7.27 (s, 1H, Ar-H), 4.95 (s, 2H, CH<sub>2</sub>), 4.20 (t, *J* = 8 Hz, 2H, CH<sub>2</sub>), 3.91 (s, 3H, CH<sub>3</sub>), 1.66 (t, *J* = 8 Hz, 2H, CH<sub>2</sub>), 1.26 (m, 18H, CH<sub>2</sub>), 0.87 (t, *J* = 8 Hz, 6H, CH<sub>3</sub>). <sup>13</sup>C NMR (100 MHz, CDCl<sub>3</sub>): δ 166.24 (C=O), 137.64 (NCN), 123.67 (NCHCHN), 123.30 (NCHCHN), 66.99 (NCH<sub>3</sub>), 49.77 (NCH<sub>2</sub>), 36.30 (CH<sub>2</sub>), 31.90 (CH<sub>2</sub>), 29.63 (CH<sub>2</sub>), 29.51 (CH<sub>2</sub>), 29.34 (CH<sub>2</sub>), 29.23 (CH<sub>2</sub>), 28.32 (CH<sub>2</sub>), 25.68 (CH<sub>2</sub>), 22.67 (CH<sub>2</sub>), 14.09 (CH<sub>3</sub>). Elemental analysis: Anal. Calcd for C<sub>18</sub>H<sub>33</sub>F<sub>6</sub>N<sub>2</sub>O<sub>2</sub>P: C, 47.57; H, 7.32; N, 6.16. Found: C, 47.58; H, 7.37; N, 6.17.

The following compounds were prepared in the same way.

**1-methyl-3-tetradecanoxyoxoethyl-imidazolium PF<sub>6</sub> [C<sub>1</sub>, EC<sub>14</sub>-Im]PF<sub>6</sub>.** White solid (Yield: 0.53g, 93%). <sup>1</sup>H NMR (400 MHz, CDCl<sub>3</sub>): δ 8.58 (s, 1H, Ar-H), 7.31 (s, 1H, Ar-H), 7.22 (s, 1H, Ar-H), 4.96 (s, 2H, CH<sub>2</sub>), 4.21 (t, *J* = 8 Hz, 2H, CH<sub>2</sub>), 3.94 (s, 3H, CH<sub>3</sub>), 1.67 (t, *J* = 8 Hz, 2H, CH<sub>2</sub>), 1.25 (m, 22H, CH<sub>2</sub>), 0.87 (t, *J* = 8 Hz, 6H, CH<sub>3</sub>). <sup>13</sup>C NMR (100 MHz, CDCl<sub>3</sub>): δ 165.98 (C=O), 137.24 (NCN), 123.60 (NCHCHN), 123.29 (NCHCHN), 67.11 (NCH<sub>3</sub>), 49.73 (NCH<sub>2</sub>), 36.27 (CH<sub>2</sub>), 31.92 (CH<sub>2</sub>), 29.71 (CH<sub>2</sub>), 29.52 (CH<sub>2</sub>), 29.36 (CH<sub>2</sub>), 29.23 (CH<sub>2</sub>), 29.28 (CH<sub>2</sub>), 25.67 (CH<sub>2</sub>), 22.68 (CH<sub>2</sub>), 14.10 (CH<sub>3</sub>). Elemental analysis: Anal. Calcd for C<sub>20</sub>H<sub>37</sub>F<sub>6</sub>N<sub>2</sub>O<sub>2</sub>P: C, 49.79; H, 7.73; N, 5.81. Found: C, 49.52; H, 8.01; N, 5.72.

**1-methyl-3-hexadecanoxyoxoethyl-imidazolium PF<sub>6</sub> [C<sub>1</sub>, EC<sub>16</sub>-Im]PF<sub>6</sub>.** White solid (Yield: 0.55 g, 96%). <sup>1</sup>H NMR (400 MHz, CDCl<sub>3</sub>): δ 8.54 (s, 1H, Ar-H), 7.31 (s, 1H, Ar-H), 7.27 (s, 1H, Ar-H), 4.95 (s, 2H, CH<sub>2</sub>), 4.20 (t, *J* = 8 Hz, 2H, CH<sub>2</sub>), 3.92 (s, 3H, CH<sub>3</sub>), 1.66 (t, *J* = 8 Hz, 2H, CH<sub>2</sub>), 1.25 (m, 26H, CH<sub>2</sub>), 0.87 (t, *J* = 4 Hz, 3H, CH<sub>3</sub>). <sup>13</sup>C NMR (100 MHz, CDCl<sub>3</sub>): δ 166.26 (C=O), 137.66 (NCN), 123.66 (NCHCHN), 123.25 (NCHCHN), 67.02 (NCH<sub>3</sub>), 49.77 (NCH<sub>2</sub>), 36.34 (CH<sub>2</sub>), 31.93 (CH<sub>2</sub>), 29.73 (CH<sub>2</sub>), 29.68 (CH<sub>2</sub>), 29.55 (CH<sub>2</sub>), 29.38 (CH<sub>2</sub>), 29.26 (CH<sub>2</sub>), 28.32 (CH<sub>2</sub>), 25.70 (CH<sub>2</sub>), 22.70 (CH<sub>2</sub>), 14.14 (CH<sub>3</sub>). Elemental analysis: Anal. Calcd for C<sub>22</sub>H<sub>41</sub>F<sub>6</sub>N<sub>2</sub>O<sub>2</sub>P: C, 51.76; H, 8.09; N, 5.49. Found: C, 51.85; H, 8.00; N, 5.43.

**Preparation of Ag-NPs.** A lyotropic LC solution sample was prepared with 40 wt% [C<sub>1</sub>, EC<sub>16</sub>-Im] Br (0.21 g, 0.47 mmol) in CHCl<sub>3</sub>. Similarly another LC solution sample has been prepared and then heated to 60 °C and cooled back to RT to prepare LC gel sample. AgNO<sub>3</sub> (0.008 g, 0.047 mmol) and subsequently 2 drops of MeOH were added to both samples. The reaction mixtures were then kept under stirring, and 30 mL of DI water was added in each and then

dropping the 5mL of an aqueous NaBH<sub>4</sub> (0.018g, 0.47 mmol) into solutions. Once all reagents were combined, both the sample vials were allowed for stirring 10 min to fully mix the reactants. Then, immediately the colourless mixture turns to deep yellow for LC solution sample, while the change from colourless to yellow to deep brown was observed in the LC gel sample, indicating the formation of Ag-NPs. The dispersed Ag-NPs in all solutions were extracted into CHCl<sub>3</sub> layer by adding each 30 mL of DI water and chloroform. Then, the resulting NPs were collected by centrifugation, washed three times with methanol and suspended in CHCl<sub>3</sub>. Each sample was transferred into two vials with one stored in dark and another under light for comparison.

**Table S1.** Crystal data and structure refinement for [C<sub>1</sub>, EC<sub>16</sub>-Im] Br

|                                                   |                                                                  |                 |
|---------------------------------------------------|------------------------------------------------------------------|-----------------|
| Identification code                               | 1                                                                |                 |
| Empirical formula                                 | C <sub>22</sub> H <sub>41</sub> Br N <sub>2</sub> O <sub>2</sub> |                 |
| Formula weight ( <i>M</i> )                       | 445.48                                                           |                 |
| Temperature                                       | 296(2) K                                                         |                 |
| Wavelength                                        | 0.71073 Å                                                        |                 |
| Crystal system                                    | Monoclinic                                                       |                 |
| Space group                                       | P2(1)/c                                                          |                 |
| Unit cell dimensions                              | a = 22.834(7)Å                                                   | α=90 deg        |
|                                                   | b = 8.194(3)Å                                                    | β=98.048(8) deg |
|                                                   | c = 13.429(4)Å                                                   | γ=90 deg        |
| Volume                                            | 2488.0(13)Å <sup>3</sup>                                         |                 |
| Z                                                 | 4                                                                |                 |
| Density (calculated)                              | 1.189 mg/m <sup>3</sup>                                          |                 |
| Absorption coefficient                            | 1.669 mm <sup>-1</sup>                                           |                 |
| <i>F</i> (000)                                    | 952                                                              |                 |
| Crystal size                                      | 0.23 x 0.21 x 0.09 mm                                            |                 |
| Theta range for data collection                   | 0.90 to 25.31 deg.                                               |                 |
| Index ranges                                      | -27<=h<=26, -9<=k<=9, -16<=l<=13                                 |                 |
| Reflections collected                             | 11675 / 4450 [R(int) = 0.0795]                                   |                 |
| Completeness to theta =                           | 98.2 %                                                           |                 |
| Absorption correction                             | Semi-empirical from equivalents                                  |                 |
| Max. and min. transmission                        | 0.8643 and 0.7001                                                |                 |
| Refinement method                                 | Full-matrix least-squares on <i>F</i> <sup>2</sup>               |                 |
| Data / restraints / parameters                    | 4450 / 0 / 246                                                   |                 |
| Goodness-of-fit on <i>F</i> <sup>2</sup>          | 0.969                                                            |                 |
| Final R indices [I > 2 <i>sigma</i> ( <i>I</i> )] | R1 = 0.0478, wR <sub>2</sub> = 0.1059                            |                 |
| R indices (all data)                              | R1 = 0.1513, wR <sub>2</sub> = 0.1607                            |                 |
| Largest diff. peak and hole                       | 0.417 and -0.590 e.Å <sup>-3</sup>                               |                 |

**Table S2.** Crystal data and structure refinement for [C<sub>1</sub>, EC<sub>16</sub>-Im] BF<sub>4</sub>

|                                          |                                                                                |                   |
|------------------------------------------|--------------------------------------------------------------------------------|-------------------|
| Identification code                      | 2                                                                              |                   |
| Empirical formula                        | C <sub>22</sub> H <sub>41</sub> N <sub>2</sub> O <sub>2</sub> B F <sub>4</sub> |                   |
| Formula weight ( <i>M</i> )              | 452.38                                                                         |                   |
| Temperature                              | 296(2) K                                                                       |                   |
| Wavelength                               | 0.71073 Å                                                                      |                   |
| Crystal system                           | Triclinic                                                                      |                   |
| Space group                              | P-1                                                                            |                   |
| Unit cell dimensions                     | a = 8.4947(7) Å                                                                | α = 82.735(4) deg |
|                                          | b = 9.0566(7) Å                                                                | β = 88.304(4) deg |
|                                          | c = 32.905(3) Å                                                                | γ = 88.047(4) deg |
| Volume                                   | 2508.9(4) Å <sup>3</sup>                                                       |                   |
| Z                                        | 4                                                                              |                   |
| Density (calculated)                     | 1.201 Mg/m <sup>3</sup>                                                        |                   |
| Absorption coefficient                   | 0.099 mm <sup>-1</sup>                                                         |                   |
| <i>F</i> (000)                           | 976                                                                            |                   |
| Crystal size                             | 0.70 x 0.25 x 0.25 mm                                                          |                   |
| Theta range for data collection          | 1.87 to 25.00 deg.                                                             |                   |
| Index ranges                             | -10 ≤ h ≤ 10, -11 ≤ k ≤ 11, -40 ≤ l ≤ 41                                       |                   |
| Reflections collected                    | 32516 / 8822 [R(int) = 0.0569]                                                 |                   |
| Completeness to theta =                  | 99.8 %                                                                         |                   |
| Absorption correction                    | None                                                                           |                   |
| Max. and min. transmission               | 0.9671 and 0.9118                                                              |                   |
| Refinement method                        | Full-matrix least-squares on <i>F</i> <sup>2</sup>                             |                   |
| Data / restraints / parameters           | 8822 / 0 / 571                                                                 |                   |
| Goodness-of-fit on <i>F</i> <sup>2</sup> | 1.055                                                                          |                   |
| Final R indices [I > 2 sigma (I)]        | R <sub>1</sub> = 0.0748, wR <sub>2</sub> = 0.1705                              |                   |
| R indices (all data)                     | R <sub>1</sub> = 0.1433, wR <sub>2</sub> = 0.1694                              |                   |
| Largest diff. peak and hole              | 0.625 and -0.511 e.Å <sup>-3</sup>                                             |                   |

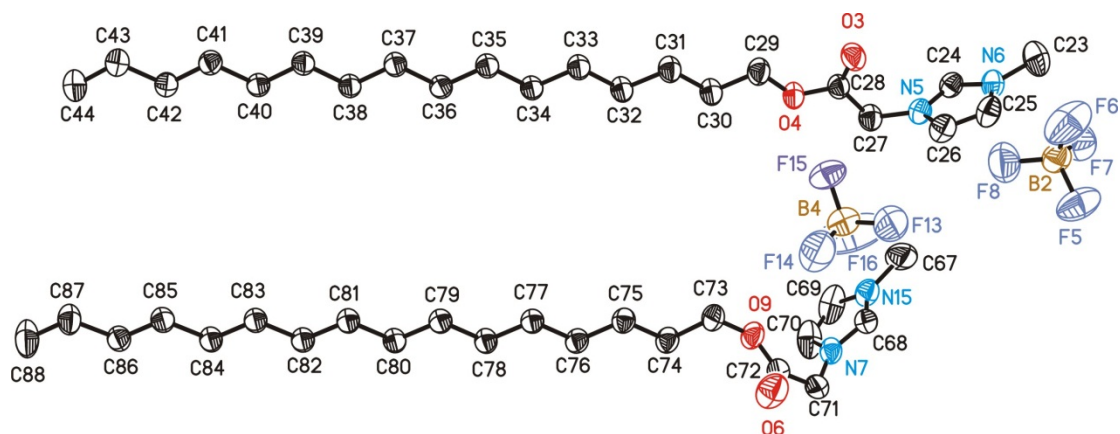

**Figure S1.** The ORTEP drawing structure of  $[C_1, EC_{16}\text{-Im}]\text{BF}_4$  (50% thermal ellipsoids), hydrogens being omitted for clarity.

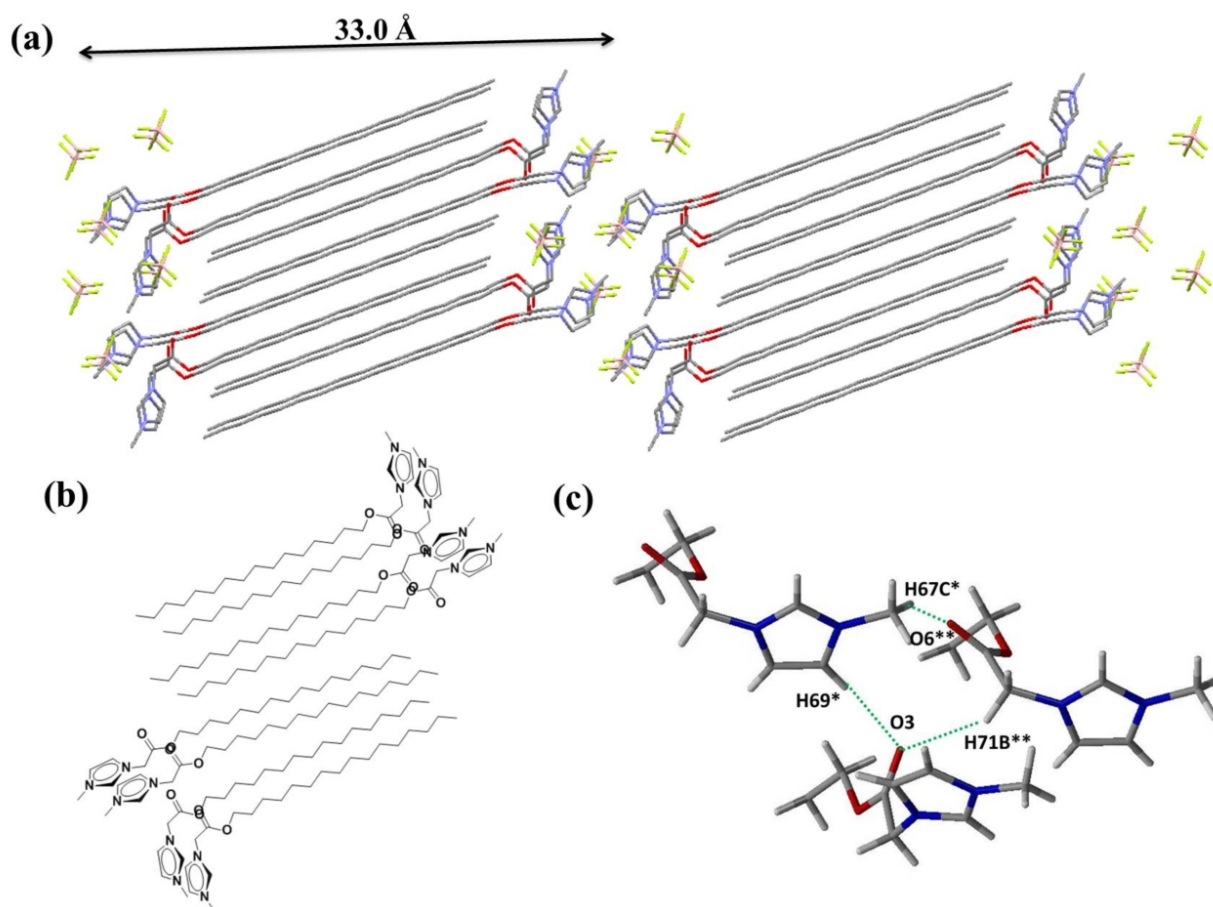

**Figure S2.** (a) Crystal packing of  $[C_1, EC_{16}\text{-Im}]\text{BF}_4$ , (b) structure packing profile of  $[C_1, EC_{16}\text{-Im}]\text{BF}_4$ ; (c) the close interactions around two different C=O groups have dimensions (H69\*...O3: 2.64 Å; O3...H71B\*\* : 2.70 Å; H67C\* ...O6\*\* : 2.47 Å) where \* is symmetry operation ( $x, -1+y, z$ ) and \*\* is symmetry operation ( $1+x, -1+y, z$ ).

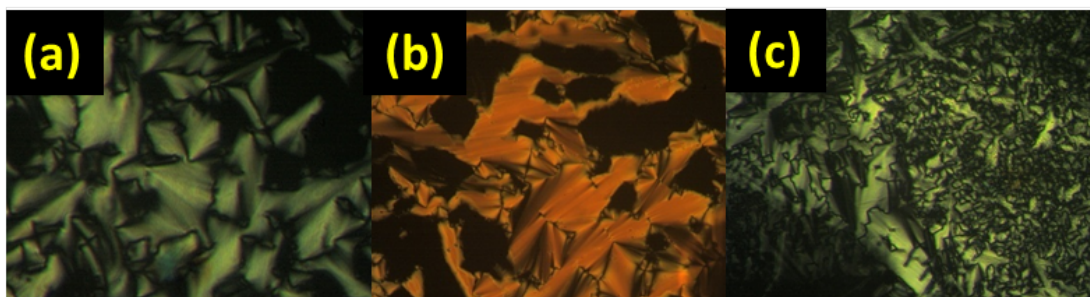

**Figure S3.** POM images of (a) [C<sub>1</sub>, EC<sub>16</sub>-Im]Br, (b) [C<sub>1</sub>, EC<sub>16</sub>-Im]BF<sub>4</sub>, (c) [C<sub>1</sub>, EC<sub>16</sub>-Im]PF<sub>6</sub> in the first cooling process at 120°C.

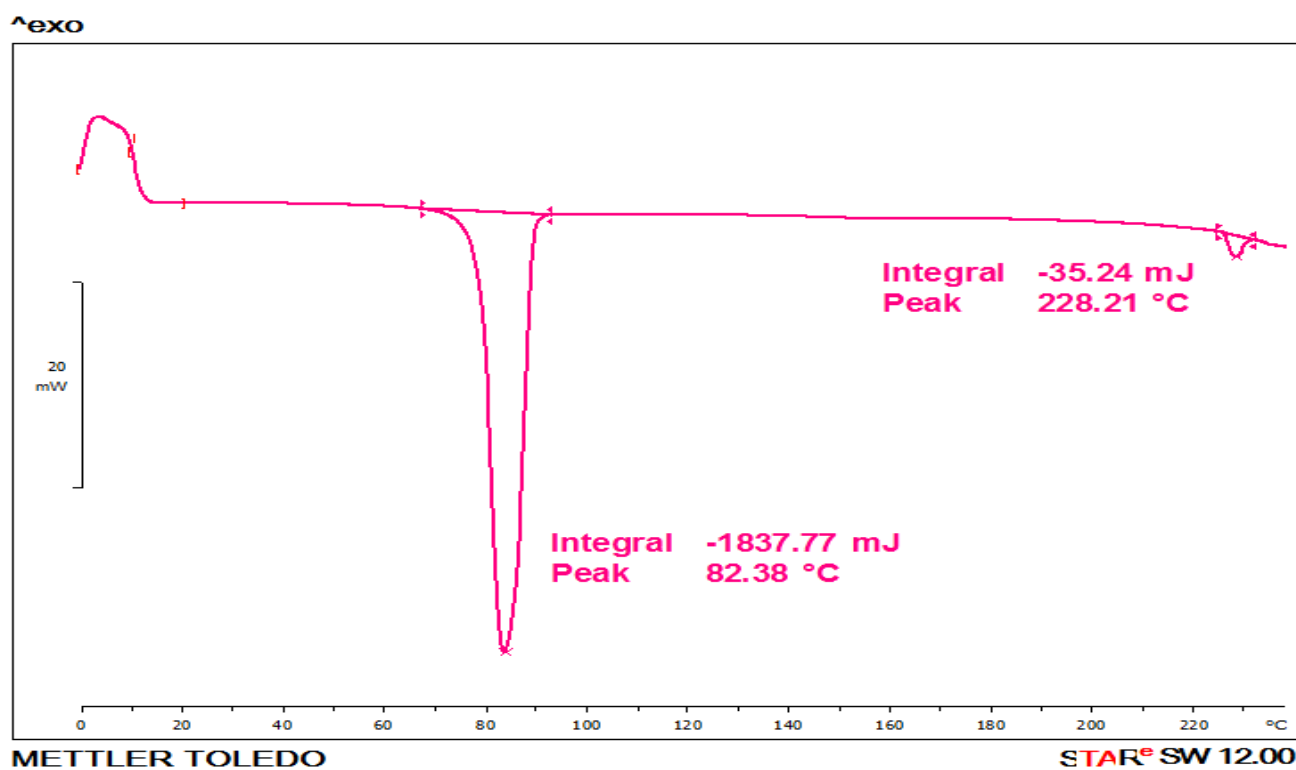

**Figure S4 (a).** DSC thermogram for [C<sub>1</sub>, EC<sub>14</sub>-Im]Br



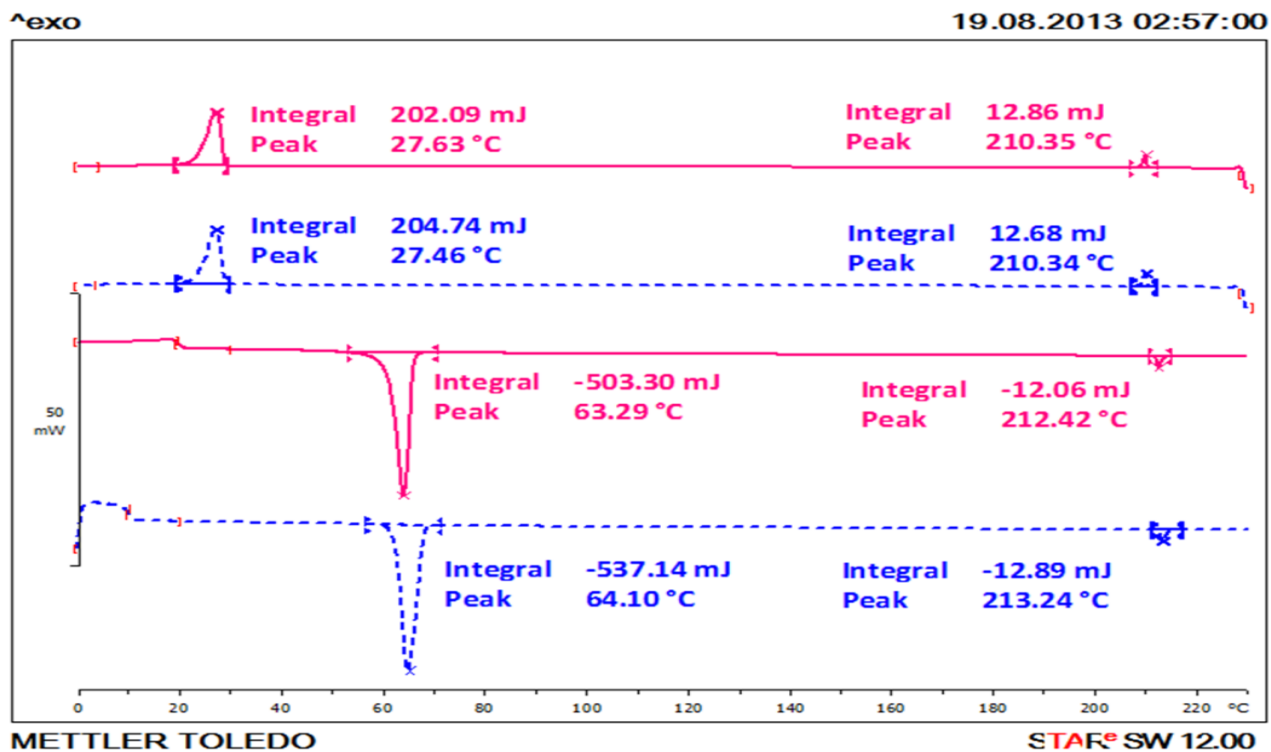

Figure S4 (b). DSC thermogram for [C<sub>1</sub>, EC<sub>14</sub>-Im]BF<sub>4</sub>

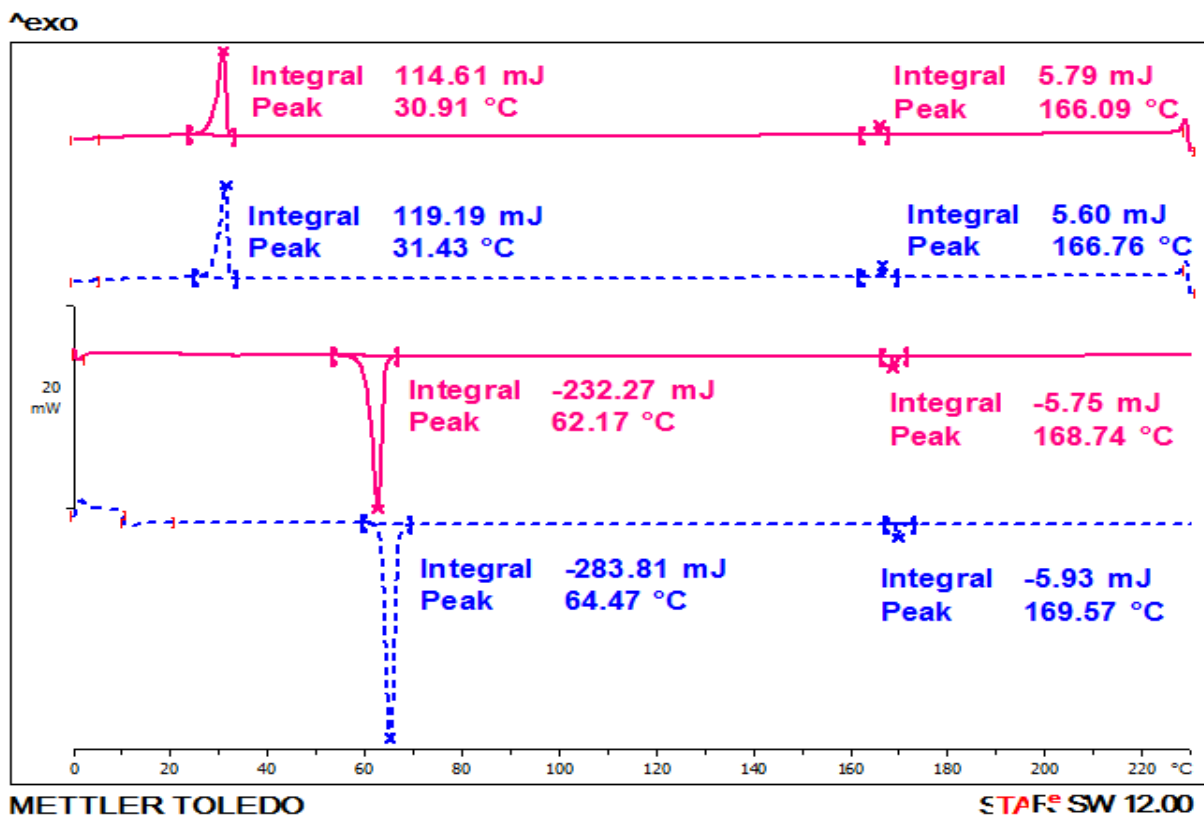

Figure S4 (c). DSC thermogram for [C<sub>1</sub>, EC<sub>14</sub>-Im]PF<sub>6</sub>

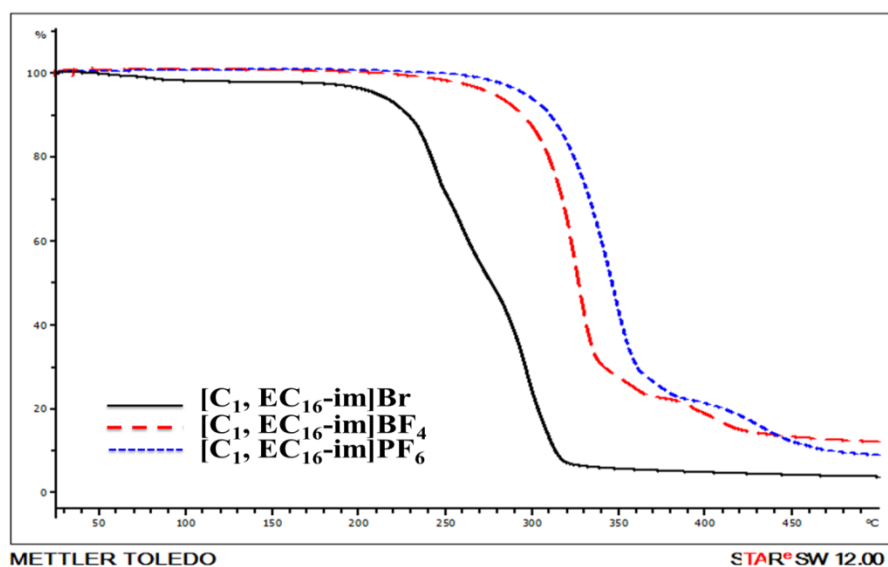

Figure S5. TGA curves for typical compound from each series

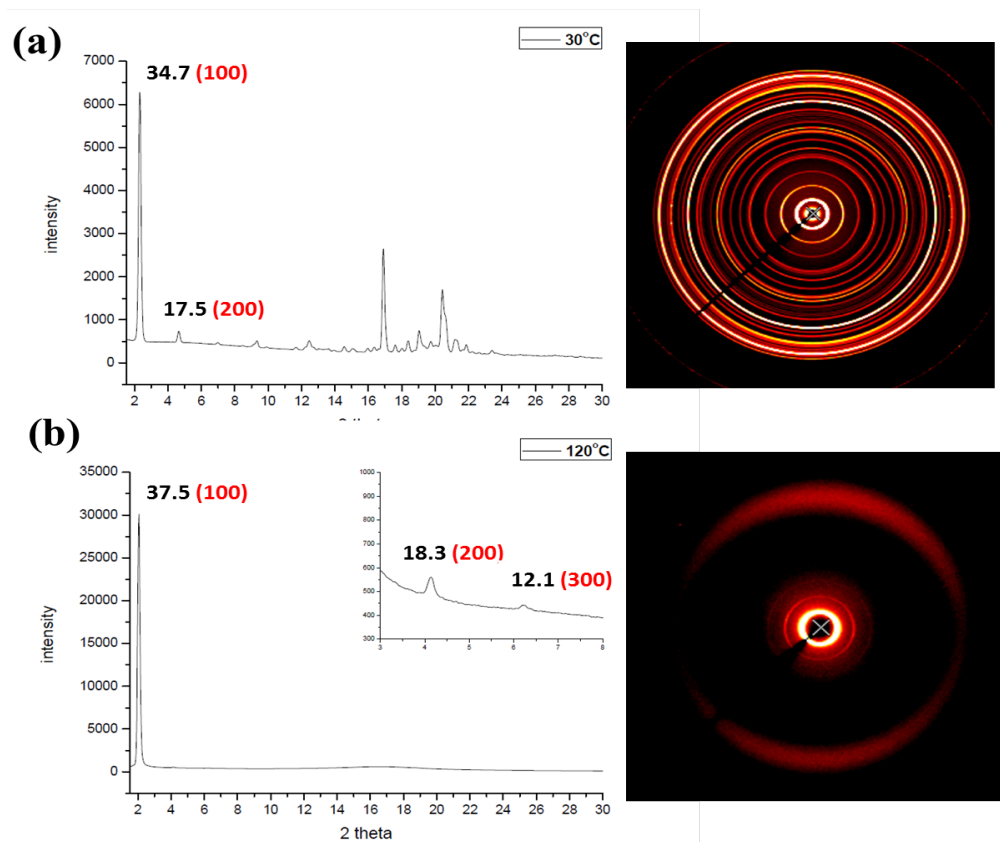

Figure S6. PXRD pattern of  $[C_1, EC_{16}\text{-Im}]\text{PF}_6$  at crystal state (a), and at mesophase (b).

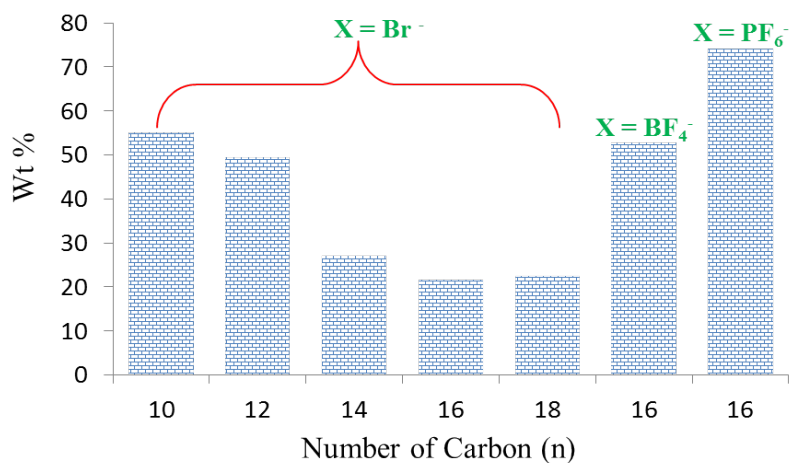

**Figure S7.** Schematic illustration of critical gel concentration of  $[C_1, EC_n\text{-Im}]\text{Br}$  (for  $n = 10, 12, 14, 16,$  and  $18$ ) and  $[C_1, EC_{16}\text{-Im}] X$  (for  $X = \text{BF}_4$  and  $\text{PF}_6$ )

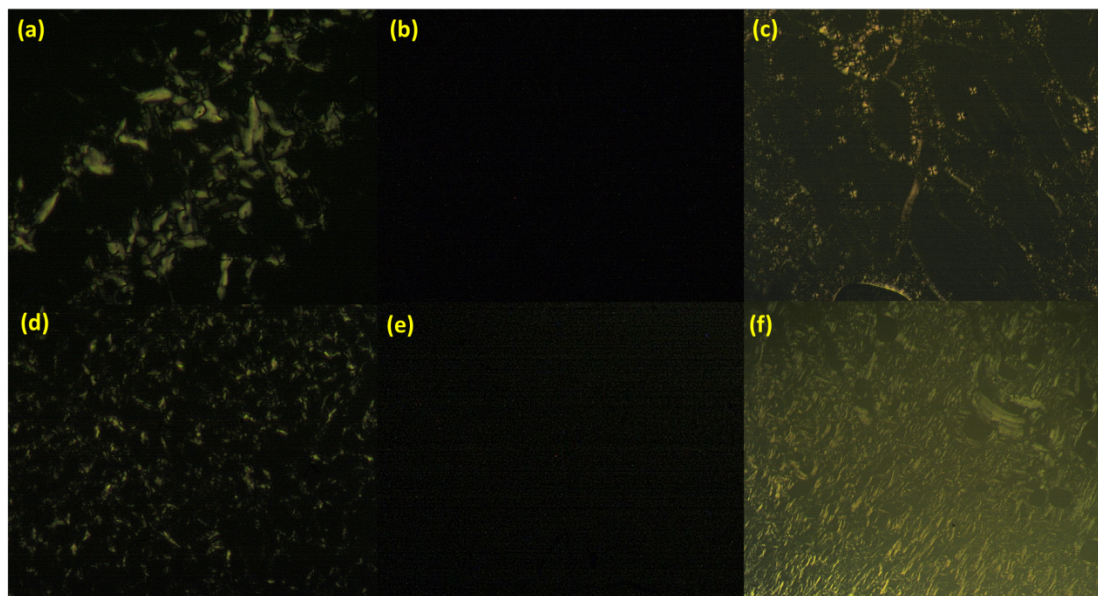

**Figure S8.** POM images of  $[C_1, EC_{14}\text{-Im}]\text{BF}_4$  in  $\text{CHCl}_3$  (a) at 45 wt% (lamellar SmA mesophase); (b) at 60 wt% (cubic phase); (c) at 60 wt% (lamellar LC gel);  $[C_1, EC_{14}\text{-Im}]\text{PF}_6$  (d) at 60 wt % (lamellar SmA mesophase); (e) at 77 wt% (cubic phase); (f) at 77 wt% (lamellar LC gel).

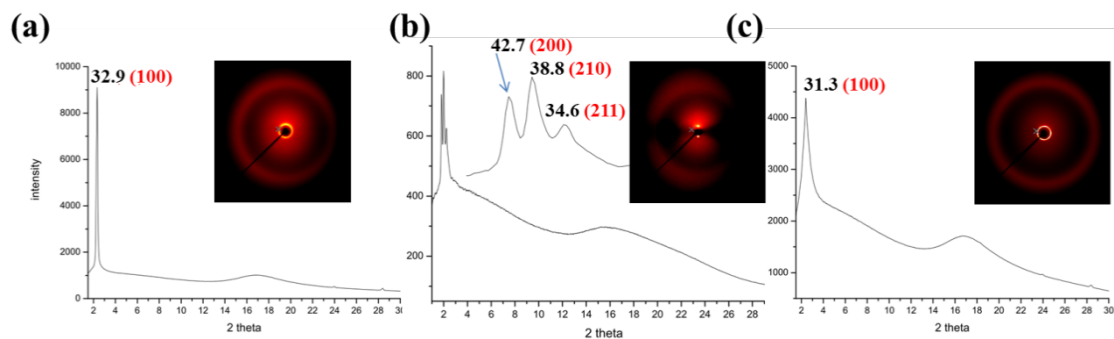

**Figure S9.** The PXR D data of [C<sub>1</sub>, EC<sub>16</sub>-Im]PF<sub>6</sub> salt in CHCl<sub>3</sub> solution at different salt gelling concentrations. (a) lamellar mesophase at 60 wt%; (b) cubic phase (Pm<sub>3n</sub>) before gelation at 77 wt%; (c) lamellar LC gel at 77 wt%.

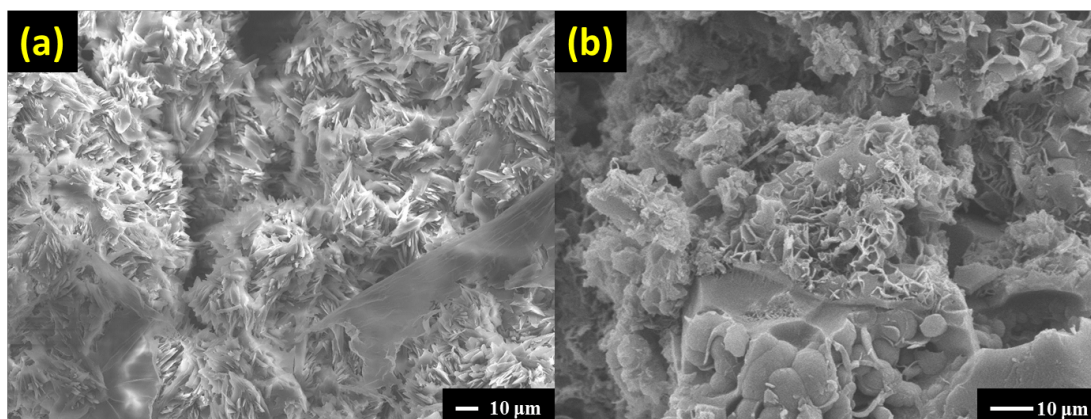

**Figure S10.** FE-SEM images of dried samples of (a): xerogel of [C<sub>1</sub>, EC<sub>16</sub>-Im]BF<sub>4</sub> and CHCl<sub>3</sub>, (b): [C<sub>1</sub>, EC<sub>16</sub>-Im]PF<sub>6</sub> and CHCl<sub>3</sub>.

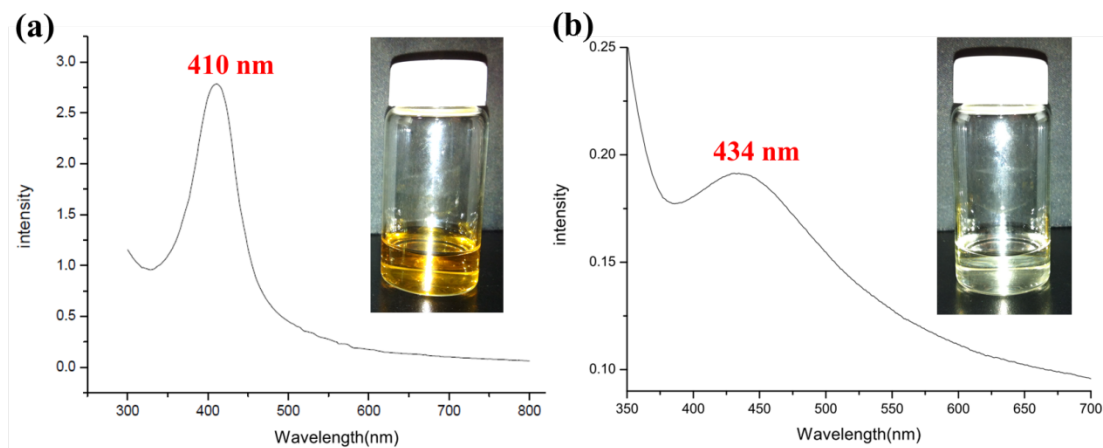

**Figure S11.** UV-Vis-images of Ag-NPs prepared in  $[C_1, EC_{16}\text{-Im}]Br$  LC gel; (a) taken after 2 days, and (b) taken after 5 days (sample images shows the disappearance of color after 3 days)

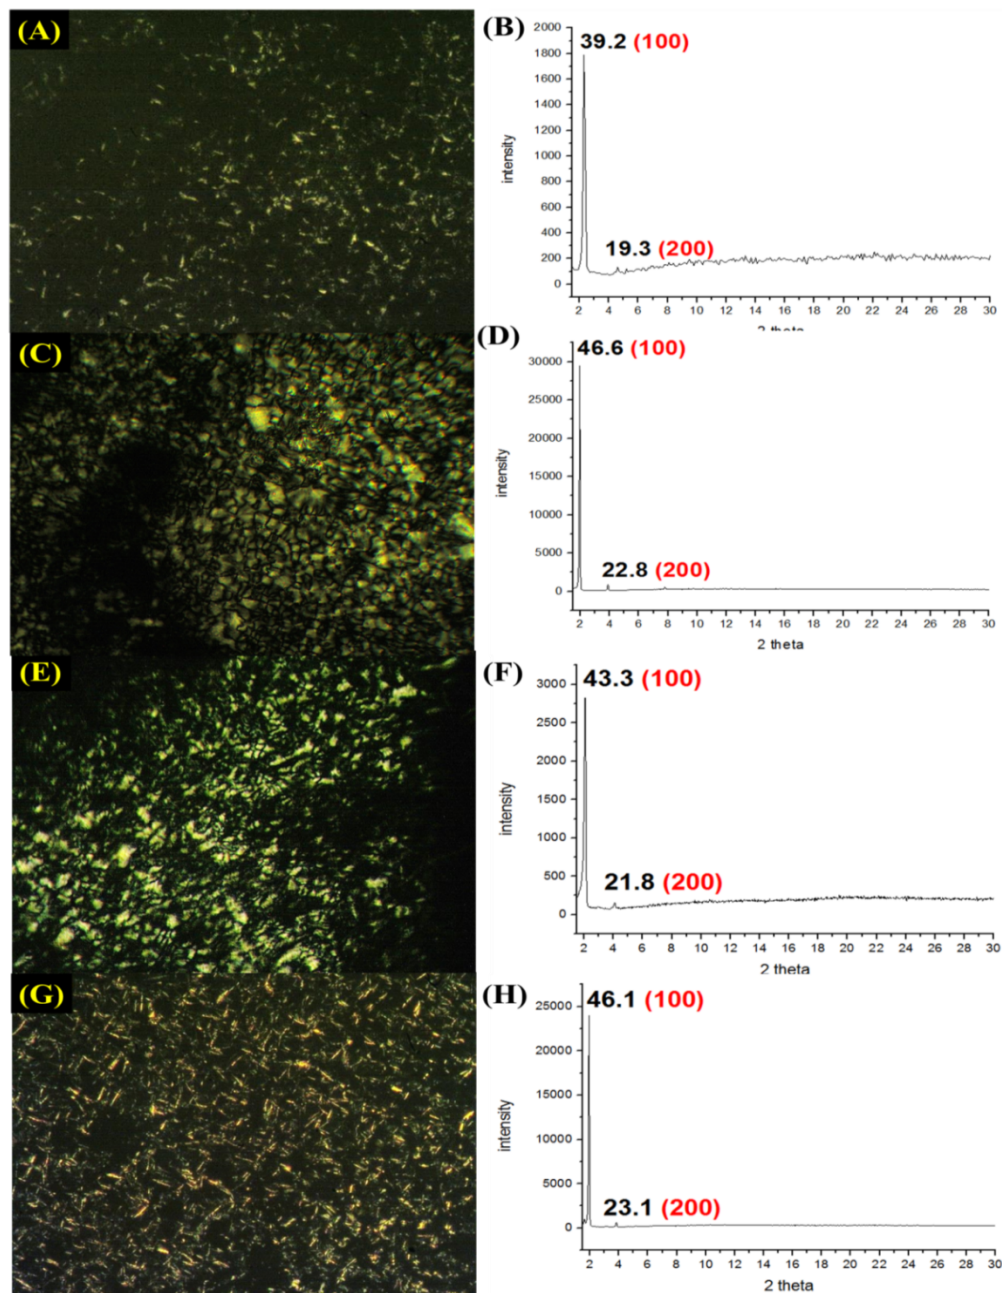

**Figure S12.** POM (broken fan like images), and PXRD (lamellar x-ray diffraction pattern) results: (A) and (B) are AgNO<sub>3</sub>@[C<sub>1</sub>, EC<sub>16</sub>-Im]Br salt in CHCl<sub>3</sub> (20 wt%) at solution state; (C) and (D) are Ag-NPs@[C<sub>1</sub>, EC<sub>16</sub>-Im]Br salt in CHCl<sub>3</sub> (20 wt%) at solution state; (E) and (F) are AgNO<sub>3</sub>@[C<sub>1</sub>, EC<sub>16</sub>-Im]Br salt in CHCl<sub>3</sub> (40 wt%) at gel state; (G) and (H) are AgNPs@[C<sub>1</sub>, EC<sub>16</sub>-Im]Br salt in CHCl<sub>3</sub> (40 wt%) at gel state.
